# Supplementary material
Source: publisher site journal article supplement (https://www.spandidos-publications.com/180/downloadSupplementary)
Supplement: Supplementary file 1 [file downloadSupplementary]

Table SI. The genes in OSgset.

| Human symbol    | Name                                                       | gene ID | Uniprot ID |
|-----------------|------------------------------------------------------------|---------|------------|
| <i>ACTN3</i>    | Actinin alpha 3                                            | 89      | Q08043     |
| <i>ADAMTS18</i> | ADAM metalloproteinase with thrombospondin type 1 motif 18 | 170692  | Q8TE60     |
| <i>ADCY10</i>   | Adenylate cyclase 10                                       | 55811   | Q96PN6     |
| <i>ADIPOQ</i>   | Adiponectin, C1Q and collagen domain containing            | 9370    | Q96A54     |
| <i>ADRA2A</i>   | Adrenoceptor alpha 2A                                      | 150     | P08913     |
| <i>AGTR2</i>    | Angiotensin II receptor type 2                             | 186     | P50052     |
| <i>AKAP11</i>   | A-kinase anchoring protein 11                              | 11215   | Q9UKA4     |
| <i>AKAP13</i>   | A-kinase anchoring protein 13                              | 11214   | Q12802     |
| <i>AKR1A1</i>   | Aldo-keto reductase family 1 member A1                     | 10327   | P14550     |
| <i>ALOX15</i>   | Arachidonate 15-lipoxygenase                               | 246     | P16050     |
| <i>ALOX5</i>    | Arachidonate 5-lipoxygenase                                | 240     | P09917     |
| <i>ALPL</i>     | Alkaline phosphatase, liver/bone/kidney                    | 249     | P05186     |
| <i>ANXA6</i>    | Annexin A6                                                 | 309     | P08133     |
| <i>APC</i>      | APC, WNT signaling pathway regulator                       | 324     | P25054     |
| <i>AKR1B1</i>   | Aldo-keto reductase family 1 member B                      | 231     | P15121     |
| <i>ARHGAP1</i>  | Rho GTPase activating protein 1                            | 392     | Q07960     |
| <i>ARHGEF3</i>  | Rho guanine nucleotide exchange factor 3                   | 50650   | Q9NR81     |
| <i>ATP5F1E</i>  | ATP synthase F1 subunit epsilon                            | 514     | P56381     |
| <i>ATP6V1G1</i> | ATPase H <sup>+</sup> transporting V1 subunit G1           | 9550    | O75348     |
| <i>ATP6V1H</i>  | ATPase H <sup>+</sup> transporting V1 subunit H            | 51606   | Q9UI12     |
| <i>AVP</i>      | Arginine vasopressin                                       | 551     | P01185     |
| <i>B2M</i>      | Beta-2-microglobulin                                       | 567     | P61769     |
| <i>BDNF</i>     | Brain derived neurotrophic factor                          | 627     | P23560     |
| <i>BMP2</i>     | Bone morphogenetic protein 2                               | 650     | P12643     |
| <i>BMP7</i>     | Bone morphogenetic protein 7                               | 655     | P18075     |
| <i>BMPRI1B</i>  | Bone morphogenetic protein receptor type 1B                | 658     | O00238     |
| <i>IBSP</i>     | Integrin binding sialoprotein                              | 3381    | P21815     |
| <i>CCDC170</i>  | Coiled-coil domain containing 170                          | 80129   | Q8IYT3     |
| <i>CA10</i>     | Carbonic anhydrase 10                                      | 56934   | Q9NS85     |
| <i>CA8</i>      | Carbonic anhydrase 8                                       | 767     | P35219     |
| <i>CALM1</i>    | Calmodulin 1                                               | 801     | P0DP23     |
| <i>CASR</i>     | Calcium sensing receptor                                   | 846     | P41180     |
| <i>CAT</i>      | Catalase                                                   | 847     | P04040     |
| <i>CNR1</i>     | Cannabinoid receptor 1                                     | 1268    | P21554     |
| <i>CCNE1</i>    | Cyclin E1                                                  | 898     | P24864     |
| <i>REL</i>      | REL proto-oncogene, NF-kB subunit                          | 5966    | Q00653     |
| <i>CCR2</i>     | C-C motif chemokine receptor 2                             | 729230  | P41597     |
| <i>CD200</i>    | CD200 molecule                                             | 4345    | P41217     |
| <i>CD40</i>     | CD40 molecule                                              | 958     | P25942     |
| <i>CD40LG</i>   | CD40 ligand                                                | 959     | P29965     |
| <i>CER1</i>     | Cerberus 1, DAN family BMP antagonist                      | 9350    | O95813     |
| <i>CFTR</i>     | Cystic fibrosis transmembrane conductance regulator        | 1080    | P13569     |
| <i>CHD2</i>     | Chromodomain helicase DNA binding protein 2                | 1106    | O14647     |
| <i>CIITA</i>    | Class II major histocompatibility complex transactivator   | 4261    | P33076     |
| <i>CLCN7</i>    | Chloride voltage-gated channel 7                           | 1186    | P51798     |
| <i>CLDN14</i>   | Claudin 14                                                 | 23562   | O95500     |
| <i>CLEC16A</i>  | C-type lectin domain containing 16A                        | 23274   | Q2KHT3     |
| <i>CNOT7</i>    | CCR4-NOT transcription complex subunit 7                   | 29883   | Q9UIV1     |
| <i>CNR2</i>     | Cannabinoid receptor 2                                     | 1269    | P34972     |
| <i>COL1A1</i>   | Collagen type I alpha 1 chain                              | 1277    | P02452     |
| <i>COL6A1</i>   | Collagen type VI alpha 1 chain                             | 1291    | P12109     |
| <i>COL9A1</i>   | Collagen type IX alpha 1 chain                             | 1297    | P20849     |
| <i>MYO5A</i>    | Myosin VA                                                  | 4644    | Q9Y4I1     |
| <i>COMT</i>     | Catechol-O-methyltransferase                               | 1312    | P21964     |
| <i>CPB2</i>     | Carboxypeptidase B2                                        | 1361    | Q96IY4     |
| <i>CRHR1</i>    | Corticotropin releasing hormone receptor 1                 | 1394    | P34998     |
| <i>CRTAP</i>    | Cartilage associated protein                               | 10491   | O75718     |
| <i>CSTA</i>     | Cystatin A                                                 | 1475    | P01040     |
| <i>TYROBP</i>   | TYRO protein tyrosine kinase binding protein               | 7305    | O43914     |

Table SI. Continued.

| Human symbol   | Name                                                | gene ID | Uniprot ID |
|----------------|-----------------------------------------------------|---------|------------|
| <i>CTHRC1</i>  | Collagen triple helix repeat containing 1           | 115908  | Q96CG8     |
| <i>CTNNB1</i>  | Catenin beta 1                                      | 1499    | P35222     |
| <i>CALCR</i>   | Calcitonin receptor                                 | 799     | P30988     |
| <i>CTSZ</i>    | Cathepsin Z                                         | 1522    | Q9UBR2     |
| <i>CXCR4</i>   | C-X-C motif chemokine receptor 4                    | 7852    | P61073     |
| <i>CYLD</i>    | CYLD lysine 63 deubiquitinase                       | 1540    | Q9NQC7     |
| <i>CYP17A1</i> | Cytochrome P450 family 17 subfamily A member 1      | 1586    | P05093     |
| <i>CYP19A1</i> | Cytochrome P450 family 19 subfamily A member 1      | 1588    | P11511     |
| <i>CYP11A1</i> | Cytochrome P450 family 1 subfamily A member 1       | 1543    | P04798     |
| <i>CYP11B1</i> | Cytochrome P450 family 1 subfamily B member 1       | 1545    | Q16678     |
| <i>CYP24A1</i> | Cytochrome P450 family 24 subfamily A member 1      | 1591    | Q07973     |
| <i>DBP</i>     | D-box binding PAR bZIP transcription factor         | 1628    | Q10586     |
| <i>DCDC1</i>   | Doublecortin domain containing 1                    | 341019  | Q6ZRR9     |
| <i>DICER1</i>  | Dicer 1, ribonuclease III                           | 23405   | Q9UPY3     |
| <i>DKK1</i>    | Dickkopf WNT signaling pathway inhibitor 1          | 22943   | O94907     |
| <i>DKK2</i>    | Dickkopf WNT signaling pathway inhibitor 2          | 27123   | Q9UBU2     |
| <i>DLX5</i>    | Distal-less homeobox 5                              | 1749    | P56178     |
| <i>DMP1</i>    | Dentin matrix acidic phosphoprotein 1               | 1758    | Q13316     |
| <i>ENPP1</i>   | Ectonucleotide pyrophosphatase/phosphodiesterase 1  | 5167    | P22413     |
| <i>ESR1</i>    | Estrogen receptor 1                                 | 2099    | P03372     |
| <i>ESRRA</i>   | Estrogen related receptor alpha                     | 2101    | P11474     |
| <i>FABP3</i>   | Fatty acid binding protein 3                        | 2170    | P05413     |
| <i>FAM210A</i> | Family with sequence similarity 210 member A        | 125228  | Q96ND0     |
| <i>FAM3C</i>   | Family with sequence similarity 3 member C          | 10447   | Q92520     |
| <i>FGF20</i>   | Fibroblast growth factor 20                         | 26281   | Q9NP95     |
| <i>FGFR1</i>   | Fibroblast growth factor receptor 1                 | 2260    | P11362     |
| <i>FGFR2</i>   | Fibroblast growth factor receptor 2                 | 2263    | P21802     |
| <i>FGFRL1</i>  | Fibroblast growth factor receptor like 1            | 53834   | Q8N441     |
| <i>FLNB</i>    | Filamin B                                           | 2317    | O75369     |
| <i>FLT1</i>    | Fms related tyrosine kinase 1                       | 2321    | P17948     |
| <i>BRD2</i>    | Bromodomain containing 2                            | 6046    | P25440     |
| <i>FTCDNLI</i> | Formiminotransferase cyclodeaminase N-terminal like | 348751  | E5RQL4     |
| <i>FOXC2</i>   | Forkhead box C2                                     | 2303    | Q99958     |
| <i>FOXL1</i>   | Forkhead box L1                                     | 2300    | Q12952     |
| <i>FRZB</i>    | Frizzled related protein                            | 2487    | Q92765     |
| <i>FTO</i>     | FTO, alpha-ketoglutarate dependent dioxygenase      | 79068   | Q9C0B1     |
| <i>FZD1</i>    | Frizzled class receptor 1                           | 8321    | Q9UP38     |
| <i>FZD6</i>    | Frizzled class receptor 6                           | 8323    | O60353     |
| <i>GALNT3</i>  | Polypeptide N-acetylgalactosaminyltransferase 3     | 2591    | Q14435     |
| <i>GDF5</i>    | Growth differentiation factor 5                     | 8200    | P43026     |
| <i>GHRH</i>    | Growth hormone releasing hormone                    | 2691    | P01286     |
| <i>GIP</i>     | Gastric inhibitory polypeptide                      | 2695    | P09681     |
| <i>GIPR</i>    | Gastric inhibitory polypeptide receptor             | 2696    | P48546     |
| <i>GSTM3</i>   | Glutathione S-transferase mu 3                      | 2947    | P21266     |
| <i>GPC6</i>    | Glypican 6                                          | 10082   | Q9Y625     |
| <i>GPNMB</i>   | Glycoprotein nmb                                    | 10457   | Q14956     |
| <i>WLS</i>     | wntless Wnt ligand secretion mediator               | 79971   | Q5T9L3     |
| <i>GPER1</i>   | G protein-coupled estrogen receptor 1               | 2852    | Q99527     |
| <i>ADGRV1</i>  | Adhesion G protein-coupled receptor V1              | 84059   | Q8WXG9     |
| <i>NR3C1</i>   | Nuclear receptor subfamily 3 group C member 1       | 2908    | P04150     |
| <i>GREM2</i>   | Gremlin 2, DAN family BMP antagonist                | 64388   | Q9H772     |
| <i>GSR</i>     | Glutathione-disulfide reductase                     | 2936    | P00390     |
| <i>GSTP1</i>   | Glutathione S-transferase pi 1                      | 2950    | P09211     |
| <i>HDAC5</i>   | Histone deacetylase 5                               | 10014   | Q9UQL6     |
| <i>HIF1A</i>   | Hypoxia inducible factor 1 alpha subunit            | 3091    | Q16665     |
| <i>REG3A</i>   | Regenerating family member 3 alpha                  | 5068    | Q06141     |
| <i>RPL29</i>   | Ribosomal protein L29                               | 6159    | P47914     |
| <i>HLA-A</i>   | Major histocompatibility complex, class I, A        | 3105    | P01892     |
| <i>HLA-B</i>   | Major histocompatibility complex, class I, B        | 3106    | P03989     |

Table SI. Continued.

| Human symbol    | Name                                                       | gene ID | Uniprot ID |
|-----------------|------------------------------------------------------------|---------|------------|
| <i>HMGA2</i>    | High mobility group AT-hook 2                              | 8091    | P52926     |
| <i>HSD11B1</i>  | Hydroxysteroid 11-beta dehydrogenase 1                     | 3290    | P28845     |
| <i>IDUA</i>     | Iduronidase, alpha-L-                                      | 3425    | P35475     |
| <i>IGF1</i>     | Insulin like growth factor 1                               | 3479    | P05019     |
| <i>IGFBP2</i>   | Insulin like growth factor binding protein 2               | 3485    | P18065     |
| <i>IL10</i>     | Interleukin 10                                             | 3586    | P22301     |
| <i>IL15</i>     | Interleukin 15                                             | 3600    | P40933     |
| <i>IL23A</i>    | Interleukin 23 subunit alpha                               | 51561   | Q9NPF7     |
| <i>IL23R</i>    | Interleukin 23 receptor                                    | 149233  | Q5VWK5     |
| <i>IL6</i>      | Interleukin 6                                              | 3569    | P05231     |
| <i>IL6R</i>     | Interleukin 6 receptor                                     | 3570    | P08887     |
| <i>IL7</i>      | Interleukin 7                                              | 3574    | P13232     |
| <i>ID4</i>      | Inhibitor of DNA binding 4, HLH protein                    | 3400    | P47928     |
| <i>SLCO6A1</i>  | Solute carrier organic anion transporter family member 6A1 | 133482  | Q86UG4     |
| <i>IRF8</i>     | Interferon regulatory factor 8                             | 3394    | Q02556     |
| <i>ITGA1</i>    | Integrin subunit alpha 1                                   | 3672    | P56199     |
| <i>JAG1</i>     | Jagged 1                                                   | 182     | P78504     |
| <i>JUND</i>     | JunD proto-oncogene, AP-1 transcription factor subunit     | 3727    | P17535     |
| <i>LCT</i>      | Lactase                                                    | 3938    | P09848     |
| <i>LEPR</i>     | Leptin receptor                                            | 3953    | P48357     |
| <i>LHB</i>      | Luteinizing hormone beta polypeptide                       | 3972    | P01229     |
| <i>LHCGR</i>    | Luteinizing hormone/choriogonadotropin receptor            | 3973    | P22888     |
| <i>LRP1</i>     | LDL receptor related protein 1                             | 4035    | Q07954     |
| <i>LRP4</i>     | LDL receptor related protein 4                             | 4038    | O75096     |
| <i>LRP5</i>     | LDL receptor related protein 5                             | 4041    | O75197     |
| <i>LRP6</i>     | LDL receptor related protein 6                             | 4040    | O75581     |
| <i>LTBP2</i>    | Latent transforming growth factor beta binding protein 2   | 4053    | Q14767     |
| <i>MAP4K4</i>   | Mitogen-activated protein kinase kinase kinase 4           | 9448    | O95819     |
| <i>MARK3</i>    | Microtubule affinity regulating kinase 3                   | 4140    | P27448     |
| <i>GLA</i>      | Galactosidase alpha                                        | 2717    | P06280     |
| <i>CCL2</i>     | C-C motif chemokine ligand 2                               | 6347    | P13500     |
| <i>IFIH1</i>    | Interferon induced with helicase C domain 1                | 64135   | Q9BYX4     |
| <i>ABCBI</i>    | ATP binding cassette subfamily B member 1                  | 5243    | P08183     |
| <i>MECOM</i>    | MDS1 and EVI1 complex locus                                | 2122    | Q03112     |
| <i>MECP2</i>    | Methyl-CpG binding protein 2                               | 4204    | P51608     |
| <i>MEF2C</i>    | Myocyte enhancer factor 2C                                 | 4208    | Q06413     |
| <i>MEPE</i>     | Matrix extracellular phosphoglycoprotein                   | 56955   | Q9NQ76     |
| <i>MTHFR</i>    | Methylenetetrahydrofolate reductase                        | 4524    | P42898     |
| <i>MMP2</i>     | Matrix metalloproteinase 2                                 | 4313    | P08253     |
| <i>MSTN</i>     | Myostatin                                                  | 2660    | O14793     |
| <i>DECRI</i>    | 2,4-dienoyl-CoA reductase 1                                | 1666    | P30043     |
| <i>NCF1</i>     | Neutrophil cytosolic factor 1                              | 653361  | P14598     |
| <i>NF1</i>      | Neurofibromin 1                                            | 4763    | P21359     |
| <i>NFATC1</i>   | Nuclear factor of activated T cells 1                      | 4772    | O95644     |
| <i>NLRC5</i>    | NLR family CARD domain containing 5                        | 84166   | Q86WI3     |
| <i>ZNF384</i>   | Zinc finger protein 384                                    | 171017  | Q8TF68     |
| <i>NMU</i>      | Neuromedin U                                               | 10874   | P48645     |
| <i>NOG</i>      | Noggin                                                     | 9241    | Q13253     |
| <i>NOS3</i>     | Nitric oxide synthase 3                                    | 4846    | P29474     |
| <i>NPY</i>      | Neuropeptide Y                                             | 4852    | P01303     |
| <i>NR1I3</i>    | Nuclear receptor subfamily 1 group I member 3              | 9970    | Q14994     |
| <i>CLEC2D</i>   | C-type lectin domain family 2 member D                     | 29121   | Q9UHP7     |
| <i>ITLN1</i>    | Intelectin 1                                               | 55600   | Q8WWA0     |
| <i>BTF3P11</i>  | Basic transcription factor 3 pseudogene 11                 | 690     | O00300     |
| <i>OXT</i>      | Oxytocin/neurophysin I prepropeptide                       | 5020    | X5D7M6     |
| <i>P2RX1</i>    | Purinergic receptor P2X 1                                  | 5023    | P51575     |
| <i>P2RX7</i>    | Purinergic receptor P2X 7                                  | 5027    | Q99572     |
| <i>SERPINE1</i> | Serpin family E member 1                                   | 5054    | P05121     |

Table SI. Continued.

| Human symbol     | Name                                                     | gene ID | Uniprot ID |
|------------------|----------------------------------------------------------|---------|------------|
| <i>PAPPA</i>     | Pappalysin 1                                             | 5069    | Q13219     |
| <i>PBX1</i>      | PBX homeobox 1                                           | 5087    | P40424     |
| <i>PCSK6</i>     | Proprotein convertase subtilisin/kexin type 6            | 5046    | P29122     |
| <i>PECAMI1</i>   | Platelet and endothelial cell adhesion molecule 1        | 5175    | P16284     |
| <i>PIR</i>       | Pirin                                                    | 8544    | O00625     |
| <i>PLOD1</i>     | Procollagen-lysine,2-oxoglutarate 5-dioxygenase 1        | 5351    | Q02809     |
| <i>PLS3</i>      | Plastin 3                                                | 5358    | P13797     |
| <i>PRL</i>       | Prolactin                                                | 5617    | P01236     |
| <i>PTCH1</i>     | Patched 1                                                | 5727    | Q13635     |
| <i>PTH</i>       | Parathyroid hormone                                      | 5741    | P01270     |
| <i>PTH LH</i>    | Parathyroid hormone like hormone                         | 5744    | P12272     |
| <i>PTH1R</i>     | Parathyroid hormone 1 receptor                           | 5745    | Q03431     |
| <i>PTH2R</i>     | Parathyroid hormone 2 receptor                           | 5746    | P49190     |
| <i>PTMA</i>      | Prothymosin alpha                                        | 5757    | P06454     |
| <i>PTN</i>       | Pleiotrophin                                             | 5764    | P21246     |
| <i>RAC1</i>      | Rac family small GTPase 1                                | 5879    | P63000     |
| <i>RAC2</i>      | Rac family small GTPase 2                                | 5880    | P15153     |
| <i>TNFRSF11A</i> | TNF receptor superfamily member 11a                      | 8792    | Q9Y6Q6     |
| <i>TNFSF11</i>   | TNF superfamily member 11                                | 8600    | O14788     |
| <i>RB1</i>       | RB transcriptional corepressor 1                         | 5925    | P06400     |
| <i>RGMA</i>      | Repulsive guidance molecule BMP co-receptor a            | 56963   | Q96B86     |
| <i>PRDM2</i>     | PR/SET domain 2                                          | 7799    | Q13029     |
| <i>ROR2</i>      | Receptor tyrosine kinase like orphan receptor 2          | 4920    | Q01974     |
| <i>RSPO3</i>     | R-spondin 3                                              | 84870   | Q9BXY4     |
| <i>RUNX2</i>     | Runt related transcription factor 2                      | 860     | Q13950     |
| <i>SAA1</i>      | Serum amyloid A1                                         | 6288    | P0DJ18     |
| <i>SATB2</i>     | SATB homeobox 2                                          | 23314   | Q9UPW6     |
| <i>CASP3</i>     | Caspase 3                                                | 836     | P54253     |
| <i>SFRP1</i>     | Secreted frizzled related protein 1                      | 6422    | Q8N474     |
| <i>SFRP2</i>     | Secreted frizzled related protein 2                      | 6423    | Q96HF1     |
| <i>SFRP4</i>     | Secreted frizzled related protein 4                      | 6424    | Q6FHJ7     |
| <i>SGCZ</i>      | Sarcoglycan zeta                                         | 137868  | Q96LD1     |
| <i>SHBG</i>      | Sex hormone binding globulin                             | 6462    | P04278     |
| <i>SEMI</i>      | SEM1, 26S proteasome complex subunit                     | 7979    | P60896     |
| <i>SLC25A13</i>  | Solute carrier family 25 member 13                       | 10165   | Q9UJS0     |
| <i>PRELID3B</i>  | PRELI domain containing 3B                               | 51012   | Q9Y3B1     |
| <i>SMOC1</i>     | SPARC related modular calcium binding 1                  | 64093   | Q9H4F8     |
| <i>SOD1</i>      | Superoxide dismutase 1                                   | 6647    | P00441     |
| <i>SOD2</i>      | Superoxide dismutase 2                                   | 6648    | P04179     |
| <i>SOST</i>      | Sclerostin                                               | 50964   | Q9BQB4     |
| <i>SOX4</i>      | SRY-box 4                                                | 6659    | Q06945     |
| <i>SOX6</i>      | SRY-box 6                                                | 55553   | P35712     |
| <i>SOX9</i>      | SRY-box 9                                                | 6662    | P48436     |
| <i>SP7</i>       | Sp7 transcription factor                                 | 121340  | Q8TDD2     |
| <i>SPARC</i>     | Secreted protein acidic and cysteine rich                | 6678    | P09486     |
| <i>SPOP</i>      | Speckle type BTB/POZ protein                             | 8405    | O43791     |
| <i>SPP1</i>      | Secreted phosphoprotein 1                                | 6696    | P10451     |
| <i>SPP2</i>      | Secreted phosphoprotein 2                                | 6694    | Q13103     |
| <i>SPRY1</i>     | Sprouty RTK signaling antagonist 1                       | 10252   | O43609     |
| <i>SPTBN1</i>    | Spectrin beta, non-erythrocytic 1                        | 6711    | Q01082     |
| <i>NCOA1</i>     | Nuclear receptor coactivator 1                           | 8648    | Q15788     |
| <i>NCOA2</i>     | Nuclear receptor coactivator 2                           | 10499   | Q15596     |
| <i>SRD5A2</i>    | Steroid 5 alpha-reductase 2                              | 6716    | P31213     |
| <i>SREBF1</i>    | Sterol regulatory element binding transcription factor 1 | 6720    | P36956     |
| <i>STARD3NL</i>  | STARD3 N-terminal like                                   | 83930   | O95772     |
| <i>SQOR</i>      | Sulfide quinone oxidoreductase                           | 58472   | Q9Y6N5     |
| <i>TERC</i>      | Telomerase RNA component                                 | 7012    | O14746     |
| <i>TGFBR3</i>    | Transforming growth factor beta receptor 3               | 7049    | Q03167     |

Table SI. Continued.

| Human symbol    | Name                                                             | gene ID | Uniprot ID  |
|-----------------|------------------------------------------------------------------|---------|-------------|
| <i>THSD4</i>    | Thrombospondin type 1 domain containing 4                        | 79875   | Q 6 Z M P 0 |
| <i>THSD7A</i>   | Thrombospondin type 1 domain containing 7A                       | 221981  | Q9UPZ6      |
| <i>TIMP1</i>    | TIMP metalloproteinase inhibitor 1                               | 7076    | P01033      |
| <i>TIMP2</i>    | TIMP metalloproteinase inhibitor 2                               | 7077    | P16035      |
| <i>TMEM135</i>  | Transmembrane protein 135                                        | 65084   | Q86UB9      |
| <i>TNF</i>      | Tumor necrosis factor                                            | 7124    | Q5STB3      |
| <i>LTA</i>      | Lymphotoxin alpha                                                | 4049    | P01374      |
| <i>TNFRSF1B</i> | TNF receptor superfamily member 1B                               | 7133    | P20333      |
| <i>F2R</i>      | Coagulation factor II thrombin receptor                          | 2149    | A0A024RAP7  |
| <i>TRPS1</i>    | Transcriptional repressor GATA binding 1                         | 7227    | Q9UHF7      |
| <i>TRPV4</i>    | Transient receptor potential cation channel subfamily V member 4 | 59341   | Q9HBA0      |
| <i>TSHR</i>     | Thyroid stimulating hormone receptor                             | 7253    | P16473      |
| <i>TUBA1B</i>   | Tubulin alpha 1b                                                 | 10376   | P68363      |
| <i>TWIST1</i>   | Twist family bHLH transcription factor 1                         | 7291    | Q15672      |
| <i>PLAUR</i>    | Plasminogen activator, urokinase receptor                        | 5329    | Q03405      |
| <i>CYP27B1</i>  | Cytochrome P450 family 27 subfamily B member 1                   | 1594    | P11473      |
| <i>VEGFA</i>    | Vascular endothelial growth factor A                             | 7422    | P15692      |
| <i>VPS13B</i>   | Vacuolar protein sorting 13 homolog B                            | 157680  | Q7Z7G8      |
| <i>DCAF13</i>   | DDB1 and CUL4 associated factor 13                               | 25879   | Q9NV06      |
| <i>WISP3</i>    | WNT1 inducible signaling pathway protein 3                       | 8838    | O95389      |
| <i>WNK4</i>     | WNK lysine deficient protein kinase 4                            | 65266   | Q96J92      |
| <i>WNT1</i>     | Wnt family member 1                                              | 7471    | P04628      |
| <i>WNT10B</i>   | Wnt family member 10B                                            | 7480    | O00744      |
| <i>WNT16</i>    | Wnt family member 16                                             | 51384   | Q9UBV4      |
| <i>WNT3A</i>    | Wnt family member 3A                                             | 89780   | P56704      |
| <i>WNT5B</i>    | Wnt family member 5B                                             | 81029   | Q9H1J7      |
| <i>WNT7B</i>    | Wnt family member 7B                                             | 7477    | P56706      |
| <i>ZBTB40</i>   | Zinc finger and BTB domain containing 40                         | 9923    | Q9NUA8      |
| <i>ZMPSTE24</i> | Zinc metalloproteinase STE24                                     | 10269   | O75844      |
| <i>HTR2B</i>    | 5-hydroxytryptamine receptor 2B                                  | 3357    | P41595      |
| <i>SNCA</i>     | Synuclein alpha                                                  | 6622    | P37840      |
| <i>ADRB2</i>    | Adrenoceptor beta 2                                              | 154     | P07750      |
| <i>ESR2</i>     | Estrogen receptor 2                                              | 2100    | Q92731      |
| <i>FDPS</i>     | Farnesyl diphosphate synthase                                    | 2224    | P14324      |
| <i>GHR</i>      | Growth hormone receptor                                          | 2690    | P10912      |
| <i>MSX1</i>     | Msh homeobox 1                                                   | 4487    | P28360      |
| <i>HSD17B2</i>  | Hydroxysteroid 17-beta dehydrogenase 2                           | 3294    | P37059      |
| <i>IFNG</i>     | Interferon gamma                                                 | 3458    | P01579      |
| <i>IL16</i>     | Interleukin 16                                                   | 3603    | Q14005      |
| <i>IL17A</i>    | Interleukin 17A                                                  | 3605    | Q16552      |
| <i>IL1A</i>     | Interleukin 1 alpha                                              | 3552    | P01583      |
| <i>PGR</i>      | Progesterone receptor                                            | 5241    | P06401      |
| <i>MGP</i>      | Matrix Gla protein                                               | 4256    | P08493      |
| <i>MMRN1</i>    | Multimerin 1                                                     | 22915   | Q13201      |
| <i>NOX4</i>     | NADPH oxidase 4                                                  | 50507   | Q9NPH5      |
| <i>NELL1</i>    | Neural EGFL like 1                                               | 4745    | Q92832      |
| <i>BGLAP</i>    | Bone gamma-carboxyglutamate protein                              | 632     | P02818      |
| <i>P2RX4</i>    | Purinergic receptor P2X 4                                        | 5025    | Q99571      |
| <i>PON1</i>     | Paraoxonase 1                                                    | 5444    | P27169      |
| <i>PLIN1</i>    | Perilipin 1                                                      | 5346    | O60240      |
| <i>PER3</i>     | Period circadian regulator 3                                     | 8863    | P56645      |
| <i>PPARG</i>    | Peroxisome proliferator activated receptor gamma                 | 5468    | P37231      |
| <i>SLC6A4</i>   | Solute carrier family 6 member 4                                 | 6532    | P31645      |
| <i>MID1</i>     | Midline 1                                                        | 4281    | O15344      |
| <i>TGFBI</i>    | Transforming growth factor beta induced                          | 7045    | O75534      |
| <i>TLR4</i>     | Toll like receptor 4                                             | 7099    | O00206      |
| <i>TRAM2</i>    | Translocation associated membrane protein 2                      | 9697    | Q15035      |
| <i>TMEM14A</i>  | Transmembrane protein 14A                                        | 28978   | Q9Y6G1      |

Table SI. Continued.

| Human symbol  | Name                                          | gene ID | Uniprot ID |
|---------------|-----------------------------------------------|---------|------------|
| <i>VKORC1</i> | Vitamin K epoxide reductase complex subunit 1 | 79001   | Q9BQB6     |
| <i>GC</i>     | GC, vitamin D binding protein                 | 2638    | P02774     |

OSgset: osteoporosis-related genes gene set.

Table SIII. Pathways enriched in OSgset.

| Pathways                                                                                                                  | P-value <sup>a</sup>   | $p_{BH}$ value <sup>b</sup> | Genes included in the pathway <sup>c</sup>                                                                                                                                                                                                                                                                                                                                                                                                                                   |
|---------------------------------------------------------------------------------------------------------------------------|------------------------|-----------------------------|------------------------------------------------------------------------------------------------------------------------------------------------------------------------------------------------------------------------------------------------------------------------------------------------------------------------------------------------------------------------------------------------------------------------------------------------------------------------------|
| Ensemble of genes encoding extracellular matrix and extracellular matrix-associated proteins                              | $3.60 \times 10^{-18}$ | $6.05 \times 10^{-15}$      | IL10, THSD4, GDF5, IL15, IL16, IL17A, SPARC, SPP1, SMOC1, MSTN, BDNF, BGLAP, MEPE, PTN, WNT5B, WISP3, NELL1, BMP2, BMP7, ADIPOQ, MGP, FGF20, WNT3A, WNT16, CTHRC1, ADAMTS18, CCL2, MMP2, DMP1, PLOD1, COL1A1, VEGFA, COL6A1, COL9A1, SFRP1, SFRP2, SFRP4, WNT1, ITLN1, ANXA6, IBSP, WNT7B, WNT10B, GPC6, IL23A, IFNG, MMRN1, TGFB1, RSPO3, IGF1, TNFSF11, IGFBP2, TIMP1, TIMP2, PCSK6, FRZB, SERPINE1, CLEC2D, CSTA, REG3A, PAPP, LTA, TNF, LTBP2, IL1A, IL6, PRL, CTSZ, IL7 |
| Wnt signaling pathway                                                                                                     | $3.71 \times 10^{-13}$ | $6.23 \times 10^{-10}$      | FZD1, FZD6, WNT5B, CER1, NFATC1, WNT3A, WNT16, RAC1, RAC2, SOST, SFRP1, SFRP2, SFRP4, WNT1, WNT7B, WNT10B, APC, DKK1, LRP6, LRP5, CTNNB1, DKK2                                                                                                                                                                                                                                                                                                                               |
| Breast cancer                                                                                                             | $4.29 \times 10^{-13}$ | $7.21 \times 10^{-10}$      | ESR1, ESR2, PGR, FZD1, FZD6, WNT5B, FGF20, WNT3A, JAG1, WNT16, FGFR1, RB1, WNT1, WNT7B, WNT10B, APC, IGF1, TNFSF11, LRP6, NCOA1, LRP5, CTNNB1                                                                                                                                                                                                                                                                                                                                |
| Genes encoding secreted soluble factors                                                                                   | $4.63 \times 10^{-13}$ | $7.78 \times 10^{-10}$      | IL10, GDF5, IL15, IL16, IL17A, MSTN, BDNF, PTN, WNT5B, BMP2, BMP7, FGF20, WNT3A, WNT16, CCL2, VEGFA, SFRP1, SFRP2, SFRP4, WNT1, WNT7B, WNT10B, IL23A, IFNG, IGF1, TNFSF11, FRZB, LTA, TNF, IL1A, IL6, PRL, IL7                                                                                                                                                                                                                                                               |
| Cytokine-cytokine receptor interaction                                                                                    | $7.86 \times 10^{-13}$ | $1.32 \times 10^{-09}$      | IL10, GDF5, IL15, IL17A, TNFRSF11A, GHR, CCR2, BMP2, BMP7, BMPR1B, CXCR4, CCL2, IL23R, VEGFA, FLT1, IL23A, LEPR, IFNG, TNFSF11, CD40, CD40LG, LTA, TNF, TNFRSF1B, IL1A, IL6, PRL, IL6R, IL7                                                                                                                                                                                                                                                                                  |
| Ensemble of genes encoding ECM-associated proteins including ECM-affiliated proteins, ECM regulators and secreted factors | $7.91 \times 10^{-12}$ | $1.33 \times 10^{-08}$      | IL10, GDF5, IL15, IL16, IL17A, MSTN, BDNF, PTN, WNT5B, BMP2, BMP7, FGF20, WNT3A, WNT16, ADAMTS18, CCL2, MMP2, PLOD1, VEGFA, SFRP1, SFRP2, SFRP4, WNT1, ITLN1, ANXA6, WNT7B, WNT10B, GPC6, IL23A, IFNG, IGF1, TNFSF11, TIMP1, TIMP2, PCSK6, FRZB, SERPINE1, CLEC2D, CSTA, REG3A, PAPP, LTA, TNF, IL1A, IL6, PRL, CTSZ, IL7                                                                                                                                                    |
| Canonical Wnt signaling                                                                                                   | $8.61 \times 10^{-12}$ | $1.45 \times 10^{-08}$      | FZD1, WNT5B, WNT3A, WNT16, WNT1, WNT7B, WNT10B, APC, DKK1, LRP6, LRP5, CTNNB1, DKK2                                                                                                                                                                                                                                                                                                                                                                                          |
| Class B/2 (Secretin family receptors)                                                                                     | $1.10 \times 10^{-11}$ | $1.85 \times 10^{-08}$      | PTCH1, PTH, PTHLH, PTH1R, PTH2R, FZD1, FZD6, GHRH, GIP, GIPR, WNT3A, WNT16, CALCR, WNT1, WNT7B, WNT10B, CRHR1                                                                                                                                                                                                                                                                                                                                                                |
| GPCR ligand binding                                                                                                       | $1.14 \times 10^{-11}$ | $1.91 \times 10^{-08}$      | AVP, TSHR, PTCH1, F2R, PTH, PTHLH, PTH1R, PTH2R, NMU, FZD1, FZD6, GHRH, CCR2, GIP, GIPR, SAA1, ADRA2A, ADRB2, CXCR4, WNT3A, WNT16, AGTR2, CNR1, NPY, CNR2, HTR2B, CALCR, GPER1, WNT1, WNT7B, WNT10B, CASR, CRHR1, LHB, LHGR, OXT                                                                                                                                                                                                                                             |
| Interleukin-4 and 13 signaling                                                                                            | $3.51 \times 10^{-11}$ | $5.90 \times 10^{-08}$      | IL10, HIF1A, IL17A, TWIST1, SAA1, CCL2, MMP2, ALOX5, IL23R, ALOX15, VEGFA, IL23A, TIMP1, TNF, TNFRSF1B, IL1A, IL6, IL6R                                                                                                                                                                                                                                                                                                                                                      |
| Genes related to Wnt-mediated signal transduction                                                                         | $5.88 \times 10^{-11}$ | $9.88 \times 10^{-08}$      | B2M, FZD1, FZD6, WNT5B, WNT3A, WNT16, SFRP1, SFRP4, WNT1, WNT7B, APC, DKK1, FRZB, LRP6, LRP5, CTNNB1                                                                                                                                                                                                                                                                                                                                                                         |
| Proteoglycans in cancer                                                                                                   | $7.02 \times 10^{-11}$ | $1.18 \times 10^{-07}$      | HIF1A, ESR1, PTCH1, TWIST1, FZD1, FZD6, WNT5B, WNT3A, WNT16, PLAUR, FGFR1, MMP2, RAC1, VEGFA, FLNB, WNT1, WNT7B, WNT10B, CASP3, IGF1, TLR4, TNF, CTNNB1                                                                                                                                                                                                                                                                                                                      |
| Cytokine Signaling in Immune system                                                                                       | $1.52 \times 10^{-10}$ | $2.56 \times 10^{-07}$      | IL10, IL15, HIF1A, IL16, IL17A, HLA-A, HLA-B, MARK3, B2M, SPTBN1, TNFRSF11A, TWIST1, GHR, CCR2, SAA1, NF1, CIITA, FGF20, MID1, CCL2, FGFR1, FGFR2, MMP2, ALOX5, IL23R, ALOX15, VEGFA, FLNB, CALM1, SEM1, IRF8, CASP3, IL23A, IFNG, TNFSF11, TIMP1, CD40, CD40LG, LTA, TNF, TNFRSF1B, IL1A, IL6, PRL, IL6R, IL7                                                                                                                                                               |
| Wnt signaling network                                                                                                     | $1.69 \times 10^{-10}$ | $2.83 \times 10^{-07}$      | FZD1, FZD6, WNT3A, CTHRC1, WNT1, WNT7B, ROR2, DKK1, LRP6, LRP5                                                                                                                                                                                                                                                                                                                                                                                                               |
| Cytokine Network                                                                                                          | $2.04 \times 10^{-10}$ | $3.42 \times 10^{-07}$      | IL10, IL15, IL16, IL17A, IFNG, LTA, TNF, IL1A, IL6                                                                                                                                                                                                                                                                                                                                                                                                                           |

Table SIII. Continued.

| Pathways                                                                                                      | P-value <sup>a</sup>   | $p_{BH}$ value <sup>b</sup> | Genes included in the pathway <sup>c</sup>                                                                                                                                                                  |
|---------------------------------------------------------------------------------------------------------------|------------------------|-----------------------------|-------------------------------------------------------------------------------------------------------------------------------------------------------------------------------------------------------------|
| Negative regulation of TCF-dependent signaling by WNT ligand antagonists                                      | 2.35x10 <sup>-10</sup> | 3.95x10 <sup>-07</sup>      | WNT3A, SOST, SFRP1, SFRP2, DKK1, LRP6, LRP5, DKK2                                                                                                                                                           |
| Rheumatoid arthritis                                                                                          | 7.22x10 <sup>-10</sup> | 1.21x10 <sup>-06</sup>      | IL15, IL17A, TNFRSF11A, CCL2, VEGFA, FLT1, ATP6V1G1, IL23A, IFNG, ATP6V1H, TNFSF11, TLR4, TNF, IL1A, IL6                                                                                                    |
| Signaling by Wnt                                                                                              | 1.07x10 <sup>-09</sup> | 1.80x10 <sup>-06</sup>      | SOX4, SOX9, WLS, FZD1, FZD6, WNT5B, NFATC1, WNT3A, WNT16, RAC1, RAC2, SOX6, SOST, SFRP1, SFRP2, CALM1, SEM1, WNT1, WNT7B, ROR2, WNT10B, APC, RSPO3, DKK1, LRP6, LRP5, CTNNB1, DKK2                          |
| Fluid shear stress and atherosclerosis                                                                        | 1.43x10 <sup>-09</sup> | 2.40x10 <sup>-06</sup>      | PECAM1, NCF1, MEF2C, BMPR1B, CCL2, MMP2, NOS3, RAC1, RAC2, VEGFA, CALM1, IFNG, GSTM3, GSTP1, TRPV4, TNF, CTNNB1, IL1A                                                                                       |
| Basal cell carcinoma                                                                                          | 1.49x10 <sup>-09</sup> | 2.51x10 <sup>-06</sup>      | PTCH1, FZD1, FZD6, WNT5B, BMP2, WNT3A, WNT16, WNT1, WNT7B, WNT10B, APC, CTNNB1                                                                                                                              |
| Pathways in cancer                                                                                            | 1.81x10 <sup>-09</sup> | 3.05x10 <sup>-06</sup>      | HIF1A, MECOM, PTCH1, F2R, FZD1, FZD6, WNT5B, BMP2, FGF20, CXCR4, WNT3A, WNT16, FGFR1, FGFR2, MMP2, RAC1, RAC2, VEGFA, RB1, WNT1, WNT7B, WNT10B, APC, CASP3, PPARG, CCNE1, GSTP1, IGF1, CTNNB1, IL6          |
| Alzheimer disease-presenilin pathway                                                                          | 1.83x10 <sup>-08</sup> | 3.08x10 <sup>-05</sup>      | FZD1, FZD6, WNT5B, WNT3A, WNT16, MMP2, WNT1, WNT7B, WNT10B, PCSK6, LRP1, LRP4, LRP6, LRP5, CTNNB1                                                                                                           |
| Validated transcriptional targets of AP1 family members Fra1 and Fra2                                         | 2.84x10 <sup>-08</sup> | 4.78x10 <sup>-05</sup>      | BGLAP, JUND, MGP, NFATC1, CCL2, PLAUR, MMP2, NOS3, IL6                                                                                                                                                      |
| Signaling pathways regulating pluripotency of stem cells                                                      | 4.81x10 <sup>-08</sup> | 8.09x10 <sup>-05</sup>      | FZD1, FZD6, WNT5B, BMPR1B, WNT3A, WNT16, FGFR1, DLX5, FGFR2, WNT1, WNT7B, WNT10B, APC, ID4, IGF1, CTNNB1                                                                                                    |
| ALK in cardiac myocytes                                                                                       | 6.37x10 <sup>-08</sup> | 1.07x10 <sup>-04</sup>      | NOG, MEF2C, FZD1, BMP2, BMP7, WNT1, APC, TGFB3, CTNNB1                                                                                                                                                      |
| Malaria                                                                                                       | 7.09x10 <sup>-08</sup> | 1.19x10 <sup>-04</sup>      | IL10, PECAM1, CCL2, IFNG, TLR4, CD40, CD40LG, LRP1, TNF, IL6                                                                                                                                                |
| Cytokines and Inflammatory Response                                                                           | 1.21x10 <sup>-07</sup> | 2.03x10 <sup>-04</sup>      | IL10, IL15, IFNG, LTA, TNF, IL1A, IL6, IL7                                                                                                                                                                  |
| Neuroactive ligand-receptor interaction                                                                       | 1.45x10 <sup>-07</sup> | 2.44x10 <sup>-04</sup>      | TSHR, F2R, PTH1R, PTH2R, GHR, GIPR, ADRA2A, ADRB2, AGTR2, CNR1, CNR2, HTR2B, CALCR, NR3C1, LEPR, CRHR1, LHB, LHCGR, P2RX1, P2RX4, P2RX7, PRL                                                                |
| HTLV-I infection                                                                                              | 1.54x10 <sup>-07</sup> | 2.59x10 <sup>-04</sup>      | IL15, HLA-A, HLA-B, FZD1, FZD6, WNT5B, NFATC1, FDPS, WNT3A, WNT16, RB1, WNT1, WNT7B, WNT10B, APC, MSX1, CD40, LTA, TNF, CTNNB1, IL6                                                                         |
| Genes encoding structural ECM glycoproteins                                                                   | 2.30x10 <sup>-07</sup> | 3.86x10 <sup>-04</sup>      | THSD4, SPARC, SPP1, SMOC1, BGLAP, MEPE, WISP3, NELL1, ADIPOQ, MGP, CTHRC1, DMP1, IBSP, MMRN1, TGFB1, RSPO3, IGFBP2, LTBP2                                                                                   |
| Metabolism of steroid hormones                                                                                | 2.79x10 <sup>-07</sup> | 4.69x10 <sup>-04</sup>      | CYP17A1, CYP19A1, SRD5A2, HSD11B1, HSD17B2, AKR1B1, LHB, STARD3NL                                                                                                                                           |
| Signaling by Interleukins                                                                                     | 4.17x10 <sup>-07</sup> | 7.02x10 <sup>-04</sup>      | IL10, IL15, HIF1A, IL16, IL17A, MARK3, SPTBN1, TWIST1, CCR2, SAA1, NF1, FGF20, CCL2, FGFR1, FGFR2, MMP2, ALOX5, IL23R, ALOX15, VEGFA, CALM1, SEM1, CASP3, IL23A, TIMP1, TNF, TNFRSF1B, IL1A, IL6, IL6R, IL7 |
| Extracellular matrix organization                                                                             | 4.82x10 <sup>-07</sup> | 8.11x10 <sup>-04</sup>      | GDF5, SPARC, SPP1, PECAM1, ITGA1, BMP2, BMP7, ADAMTS18, MMP2, DMP1, PLOD1, CRTAP, COL1A1, COL6A1, COL9A1, IBSP, CASP3, TIMP1, TIMP2, SERPINE1, LRP4, LTBP2                                                  |
| Ensemble of genes encoding core extracellular matrix including ECM glycoproteins, collagens and proteoglycans | 5.09x10 <sup>-07</sup> | 8.56x10 <sup>-04</sup>      | THSD4, SPARC, SPP1, SMOC1, BGLAP, MEPE, WISP3, NELL1, ADIPOQ, MGP, CTHRC1, DMP1, COL1A1, COL6A1, COL9A1, IBSP, MMRN1, TGFB1, RSPO3, IGFBP2, LTBP2                                                           |

Table SIII. Continued.

| Pathways                                                                       | P-value <sup>a</sup>   | <i>p</i> <sub>BH</sub> value <sup>b</sup> | Genes included in the pathway <sup>c</sup>                                                                                                      |
|--------------------------------------------------------------------------------|------------------------|-------------------------------------------|-------------------------------------------------------------------------------------------------------------------------------------------------|
| Signaling by WNT in cancer                                                     | 5.91x10 <sup>-07</sup> | 9.93x10 <sup>-04</sup>                    | FZD6, WNT3A, APC, DKK1, LRP6, LRP5, CTNNB1, DKK2                                                                                                |
| Wnt signaling pathway                                                          | 7.16x10 <sup>-07</sup> | 1.20x10 <sup>-03</sup>                    | FZD1, FZD6, WNT5B, CER1, BMPR1B, NFATC1, WNT3A, WNT16, SFRP1, SFRP2, SFRP4, WNT1, WNT7B, WNT10B, APC, DKK1, FRZB, LRP6, LRP5, TNF, CTNNB1, DKK2 |
| Angiogenesis                                                                   | 8.07x10 <sup>-07</sup> | 1.36x10 <sup>-03</sup>                    | HIF1A, FZD1, WNT5B, JAG1, FGFR1, NOS3, VEGFA, SFRP1, WNT1, WNT7B, WNT10B, APC, ARHGAP1, FRZB, CTNNB1                                            |
| Ovarian steroidogenesis                                                        | 1.00x10 <sup>-06</sup> | 1.69x10 <sup>-03</sup>                    | CYP1A1, CYP1B1, CYP17A1, CYP19A1, HSD17B2, ALOX5, LHB, LHCGR, IGF1                                                                              |
| Hippo signaling pathway                                                        | 1.13x10 <sup>-06</sup> | 1.90x10 <sup>-03</sup>                    | GDF5, FZD1, FZD6, WNT5B, BMP2, BMP7, BMPR1B, WNT3A, WNT16, WNT1, WNT7B, WNT10B, APC, SERPINE1, CTNNB1                                           |
| Inflammatory bowel disease (IBD)                                               | 1.14x10 <sup>-06</sup> | 1.92x10 <sup>-03</sup>                    | IL10, IL17A, NFATC1, IL23R, IL23A, IFNG, TLR4, TNF, IL1A, IL6                                                                                   |
| WNT ligand biogenesis and trafficking                                          | 1.22x10 <sup>-06</sup> | 2.05x10 <sup>-03</sup>                    | WLS, WNT5B, WNT3A, WNT16, WNT1, WNT7B, WNT10B                                                                                                   |
| AGE-RAGE signaling pathway in diabetic complications                           | 1.36x10 <sup>-06</sup> | 2.28x10 <sup>-03</sup>                    | NFATC1, CCL2, MMP2, NOS3, RAC1, COL1A1, VEGFA, CASP3, SERPINE1, TNF, IL1A, IL6                                                                  |
| G alpha (s) signalling events                                                  | 3.12x10 <sup>-06</sup> | 5.24x10 <sup>-03</sup>                    | AVP, TSHR, PTH, PTHLH, PTH1R, PTH2R, GHRH, GIP, GIPR, ADRB2, CALCR, CRHR1, LHB, LHCGR                                                           |
| Disassembly of the destruction complex and recruitment of AXIN to the membrane | 4.21x10 <sup>-06</sup> | 7.07x10 <sup>-03</sup>                    | FZD1, WNT3A, WNT1, APC, LRP6, LRP5, CTNNB1                                                                                                      |
| Osteoclast differentiation                                                     | 4.42x10 <sup>-06</sup> | 7.44x10 <sup>-03</sup>                    | CYLD, NCF1, TNFRSF11A, TYROBP, JUND, NFATC1, RAC1, CALCR, PPARG, IFNG, TNFSF11, TNF, IL1A                                                       |
| mTOR signaling pathway                                                         | 4.64x10 <sup>-06</sup> | 7.80x10 <sup>-03</sup>                    | FZD1, FZD6, WNT5B, WNT3A, WNT16, WNT1, WNT7B, WNT10B, ATP6V1G1, ATP6V1H, IGF1, LRP6, LRP5, TNF                                                  |
| PI3K-Akt signaling pathway                                                     | 4.74x10 <sup>-06</sup> | 7.98x10 <sup>-03</sup>                    | SPP1, ITGA1, F2R, GHR, FGF20, FGFR1, FGFR2, NOS3, RAC1, COL1A1, VEGFA, COL6A1, COL9A1, FLT1, IBSP, CCNE1, IGF1, TLR4, IL6, PRL, IL6R, IL7       |
| TCF dependent signaling in response to WNT                                     | 4.92x10 <sup>-06</sup> | 8.27x10 <sup>-03</sup>                    | SOX4, SOX9, FZD1, FZD6, WNT3A, SOX6, SOST, SFRP1, SFRP2, SEM1, WNT1, APC, RSPO3, DKK1, LRP6, LRP5, CTNNB1, DKK2                                 |
| Wnt/beta-catenin Pathway                                                       | 6.48x10 <sup>-06</sup> | 1.09x10 <sup>-02</sup>                    | CER1, SFRP1, APC, DKK1, LRP1, CTNNB1, DKK2                                                                                                      |
| Interleukin-10 signaling                                                       | 8.72x10 <sup>-06</sup> | 1.47x10 <sup>-02</sup>                    | IL10, CCR2, CCL2, TIMP1, TNF, TNFRSF1B, IL1A, IL6                                                                                               |
| Glucocorticoid receptor regulatory network                                     | 9.88x10 <sup>-06</sup> | 1.66x10 <sup>-02</sup>                    | BGLAP, NFATC1, NR1I3, NCOA2, NR3C1, IFNG, NCOA1, PBX1, IL6, PRL                                                                                 |
| HIF-1 signaling pathway                                                        | 1.07x10 <sup>-05</sup> | 1.80x10 <sup>-02</sup>                    | HIF1A, NOS3, VEGFA, FLT1, IFNG, IGF1, TIMP1, TLR4, SERPINE1, IL6, IL6R                                                                          |
| The IGF-1 Receptor and Longevity                                               | 1.12x10 <sup>-05</sup> | 1.88x10 <sup>-02</sup>                    | GHR, CAT, IGF1, SOD1, SOD2                                                                                                                      |
| IL23-mediated signaling events                                                 | 1.17x10 <sup>-05</sup> | 1.97x10 <sup>-02</sup>                    | IL17A, CCL2, IL23R, IL23A, IFNG, TNF, IL6                                                                                                       |
| Detoxification of Reactive Oxygen Species                                      | 1.41x10 <sup>-05</sup> | 2.37x10 <sup>-02</sup>                    | NCF1, NOX4, CAT, GSR, GSTP1, SOD1, SOD2                                                                                                         |
| Allograft rejection                                                            | 1.41x10 <sup>-05</sup> | 2.37x10 <sup>-02</sup>                    | IL10, HLA-A, HLA-B, IFNG, CD40, CD40LG, TNF                                                                                                     |
| Circadian Clock                                                                | 2.01x10 <sup>-05</sup> | 3.38x10 <sup>-02</sup>                    | HIF1A, AVP, SREBF1, DBP, MEF2C, NCOA2, NR3C1, SERPINE1, NCOA1                                                                                   |
| RNF mutants show enhanced WNT signaling and proliferation                      | 2.43x10 <sup>-05</sup> | 4.08x10 <sup>-02</sup>                    | FZD6, WNT3A, LRP6, LRP5                                                                                                                         |

OSgset: osteoporosis-related genes gene set. <sup>a</sup>P-values were calculated by Fisher's exact test. <sup>b</sup>PBH values were adjusted by Benjamini and Hochberg (BH) method. <sup>c</sup>Two hundred ninety-four OS-related genes included in the pathway
